# Supplementary material for: The Characteristics and Distribution of α2D-, α2B- and α2C-Adrenoceptor Subtypes in Goats
Source: MDPI journal article supplement (doi:10.3390/ani12050664), 2022-03-07
Supplement: s1 [file s1]

α2D MFRQEQLAEGSFAPMGLSLQPDAGNASWNGTEAPGGGARATP...YSLOVTLTLVCLAGLIMLTVFGNVLVIIAVFTSRALKAPQNLFLVSLASADILV 97  
 α2B .....MDHQBP...YSVQATAIAIAVITFLILFTISGNALVLAIVTSRSRAPQNLFLVSLASADILV 61  
 α2C MASPALAAALAAAAGPNASGAGDGGSGRVANGSGAPWGPFGQSSAGAVAGLAAVVGFLIVTVFGNVLVIIAVFTSRALKAPQNLFLVSLASADILV 100  
 Consensus .....p ys .....l ft gn lv av tsr l apqnlflvslas adilv  
 α2D ATIVIPFSLANEVMGYWYFGKAWCEIYLALDVLFTCTSSIVHLCAISLDRYWSITQAEYNLKRTPRRKAIITVWVISAVISFPPLISFEKKRGRSGQAE 197  
 α2B ATIVIPFSLANEVLLGYWYFWRWCEIYLALDVLFTCTSSIVHLCAISLDRYWAVSPALEYNSKRTPRRKFIILIVWIIAIVISFPPLI...YKGDQGPQAE 158  
 α2C ATIVIPFSLANEVLMAYWYFGQVWCEIYLALDVLFTCTSSIVHLCAISLDRYWSVTQAEYNLKRTPRRKATITVWVISAVISFPPLIS...LYRRPDG 196  
 Consensusatlp fslane ywyf wc yialdvlftctssivhlcaisldryw a eyn krtpr k i vw i avis ppl  
 α2D SLPERRRINDQKWIYVSSIGSFFAPCLIMILVVRIVQIAKRRTVPVPSRRGDA...G..GAERRPNGLGPERSGVGPVGAEEVSLQVQLNGAP 294  
 α2B LARPOCKINQEWYLLASSIGSFFAPCLIMILVVRIVQIAKRSHCGPRAKGCGGREGSKQHPVPGEVSDSAKLPTLASQLATPGEANGCSQHPAEK 258  
 α2C AAYEQCGINDETWLLSSIGSFFAPCLIMGLVVRIVRIYVAKLRTETLSEKREAGPDGAST.....TENGLG.....AGENGHCVPARRPR 279  
 Consensusa p c n wy s igsffapclim lvy riy ak r p p  
 α2D GEPAPAGRPDADALD...LEESSSEHAERPPGSRSSRGPRAKGKARASQVREGDLSLPRRGEGATGPG...APAAAPAEERSG.GAKASRWGR. 383  
 α2B GEGQTPEAGTAPLPSPWPAIPKSGQGGKEGVCSSPFEEAEEEGEGCEPQALAPPASACSEPLQGPQGLRVIALTRGQVLLGRGTGAGAGQWWRRT 358  
 α2C ADVEQEDSSAAEARR.....RRRGALRRGRRRGAGEGAADAGTGPGTVTADEGALAAARSGPGGRLSR...SSRSVEFFLSRRRRRSVCRKRV 370  
 Consensus .....p p a a r  
 α2D QREKRFTFVLAVVGVFVCFWFPFFFTYTLTAAG...CSVFPTLRFFFFWGYCNSSLNPVIYTFNHDFFRAFKKILCRGDRKRV 468  
 α2B QLSREKRFTFVLAVVGVFVCFWFPFFFSUSLCAICPLHCKVPHGLFQFFFWGYCNSSLNPVIYTFNODFFRAFRILCRQWTQT. 446  
 α2C AQREKRFTFVLAVVGVFVCFWFPFFFSUSLYGCREACQVGLPFLFFFWGYCNSSLNPVIYTFNODFFRSKKHILFRRRRGFR 459  
 Consensus rekrftfvlavv gvfv cwfpf y l i c vp lf fffw gycnsslnpviytfn dfrf f il r

Supplementary figure S1. Amino acid sequence alignment of goat α2-adrenergic receptor subtypes. α2B, α2C and α2D subtypes.

Human MFRQEQLAEGSFAPMGLSLQPDAGNASWNGTEAPGGGARATPYSLOVTLTLVCLAGLIMLTVFGNVLVIIAVFTSRALKAPQNLFLVSLASADILVATL 100  
 Mouse MFRQEQLAEGSFAPMGLSLQPDAGNASWNGTEAPGGGARATPYSLOVTLTLVCLAGLIMLTVFGNVLVIIAVFTSRALKAPQNLFLVSLASADILVATL 100  
 Cow .....MGLSLQPDAGNASWNGTEAPGGGARATPYSLOVTLTLVCLAGLIMLTVFGNVLVIIAVFTSRALKAPQNLFLVSLASADILVATL 85  
 Goat MFRQEQLAEGSFAPMGLSLQPDAGNASWNGTEAPGGGARATPYSLOVTLTLVCLAGLIMLTVFGNVLVIIAVFTSRALKAPQNLFLVSLASADILVATL 100  
 Consensus mgsllqpdagn swngteapggg ratpyslqvltltlvclagliml tvfgnvlviiavftsralkapqnlflvslasadilvatl  
 Human VIPFSLANEVMGYWYFGKAWCEIYLALDVLFTCTSSIVHLCAISLDRYWSITQAEYNLKRTPRRKAIITVWVISAVISFPPLISEKKGGGGPQAE 200  
 Mouse VIPFSLANEVMGYWYFGKAWCEIYLALDVLFTCTSSIVHLCAISLDRYWSITQAEYNLKRTPRRKAIITVWVISAVISFPPLISEKKGGGGPQAE 200  
 Cow VIPFSLANEVMGYWYFGKAWCEIYLALDVLFTCTSSIVHLCAISLDRYWSITQAEYNLKRTPRRKAIITVWVISAVISFPPLISEKKRGRSGQPSAE 185  
 Goat VIPFSLANEVMGYWYFGKAWCEIYLALDVLFTCTSSIVHLCAISLDRYWSITQAEYNLKRTPRRKAIITVWVISAVISFPPLISEKKRGRSGQPSAE 200  
 Consensusvipfslanevmgywyfgk wceiyaldvlftctssivhlcaisldrywsitqaeynlkrtprrikaii tvwvisavisfpplis ekk g ae  
 Human PRCEINDQKWIYVSSIGSFFAPCLIMILVVRIVQIAKRRTVPVPSRRGPDAAAP...PGGTERRPNGLGPERS..AGGGABEELPTQLNGAPGEPAPA 298  
 Mouse PRCEINDQKWIYVSSIGSFFAPCLIMILVVRIVQIAKRRTVPVPSRRGPDACSAP..PGGADRRPNGLGPERS..AGTGABAEELPTQLNGAPGEPAPA 298  
 Cow PRCEINDQKWIYVSSIGSFFAPCLIMILVVRIVQIAKRRTVPVPSRRGPDAAAP...PGGAERRPNGLGPERSGGVGEVGAEBEELPTQLNGAPGEPAPA 285  
 Goat PRCEINDQKWIYVSSIGSFFAPCLIMILVVRIVQIAKRRTVPVPSRRGPDAAAP...PGGAERRPNGLGPERSGGVGEVGAEBEELPTQLNGAPGEPAPA 300  
 Consensusp c indqkwyviss igsffapclimilvvrivqiakrtrrvppsrrgpd a a pg rrpnglper gp gae e l qlngapgepapa  
 Human PRPDALDLEESSSSHAERPPGRRRERGPRKGRKASQVKPGDLSLPRRGPGATGCTEAPRGGEERVA...AKASRWGRGRONREKRFTFVLAVVIGV 397  
 Mouse PRPDALDLEESSSSHAERPPGRRRERGPRKGRKASQVKPGDLSLPRRGPGATGCTEAPRGGEERVA...AKASRWGRGRONREKRFTFVLAVVIGV 397  
 Cow PRPDALDLEESSSSHAERPPGRRRERGPRKGRKASQVKPGDLSLPRRGPGATGCTEAPRGGEERVA...AKASRWGRGRONREKRFTFVLAVVIGV 384  
 Goat PRPDALDLEESSSSHAERPPGRRRERGPRKGRKASQVKPGDLSLPRRGPGATGCTEAPRGGEERVA...AKASRWGRGRONREKRFTFVLAVVIGV 400  
 Consensusug daldleessss haerppg rr rgpr kgk rasqvkpgdlsprrgp g g g eer g akasrwgrgronrekrftfvlavvigv  
 Human FVVCWPPFFFTYTLTAAGCSVERLRFNFFFWGYCNSSLNPVIYTFNHDFFRAFKKILCRGDRKRI 464  
 Mouse FVVCWPPFFFTYTLTAAGCSVERLRFNFFFWGYCNSSLNPVIYTFNHDFFRAFKKILCRGDRKRI 464  
 Cow FVVCWPPFFFTYTLTAAGCSVERLRFNFFFWGYCNSSLNPVIYTFNHDFFRAFKKILCRGDRKRI 451  
 Goat FVVCWPPFFFTYTLTAAGCSVERLRFNFFFWGYCNSSLNPVIYTFNHDFFRAFKKILCRGDRKRI 467  
 Consensusufvcwfpffftylt a gc vp lf fffwgycnsslnpviytfifnhdffrafkkilcrgdrkri

Supplementary figure S2. Amino acid sequence alignment of human (NP\_000672.3), mouse (NP\_031443.4), cattle (NP\_776924.1), and goat (XP\_017897206.1) α2A/D-adrenergic receptor subtypes.

|           |   |                                |                   |      |     |
|-----------|---|--------------------------------|-------------------|------|-----|
| Human     | K | HCKVPHGLFQFFFWIGYCNSSLNPVIYT   | FNQDFRRAFRRLRCR   | WTQT | 449 |
| Mouse     | C | HCKVPHGLFQFFFWIGYCNSSLNPVIYT   | FNQDFRRAFRRLRCR   | WTQT | 447 |
| Cow       | C | HCKVPHGLFQFFFWIGYCNSSLNPVIYT   | FNQDFRRAFRRLRCR   | WTQT | 446 |
| Goat      | L | HCKVPHGLFQFFFWIGYCNSSLNPVIYT   | FNQDFRRAFRRLRCR   | WTQT | 446 |
| Consensus | h | ckvp hglfqfffwigycnssl nlpviyt | fnqdfrrafr rrlrcr | wtqt |     |

Supplementary figure S3. Amino acid sequence alignment of human, mouse, cattle, and goat  $\alpha 2B$ -adrenergic receptor subtypes.

[illegible]

Supplementary figure S4. Amino acid sequence alignment of human, mouse, cattle, and goat  $\alpha 2C$ -adrenergic receptor subtypes.

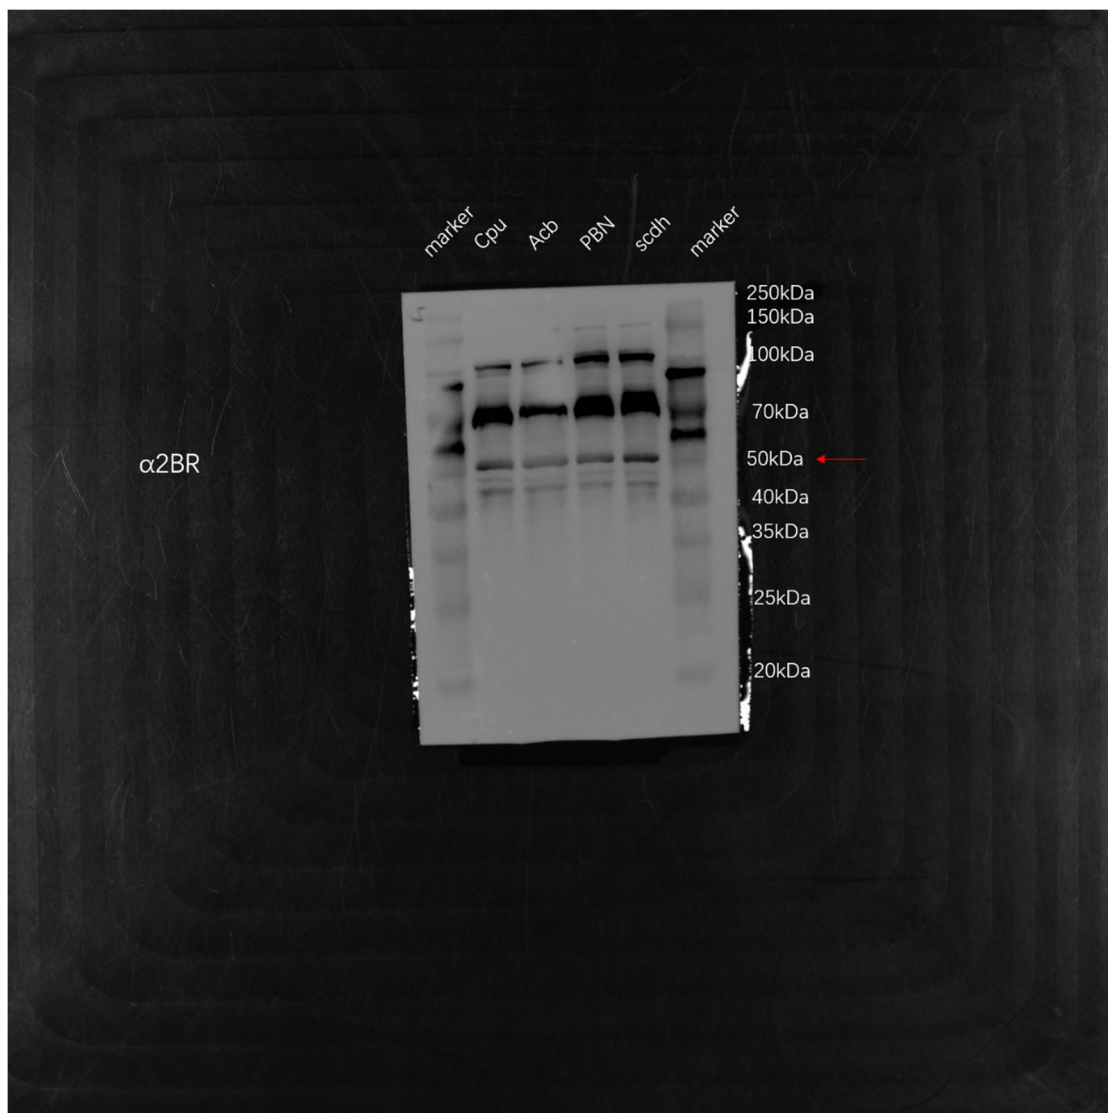

$\alpha$ 2BR

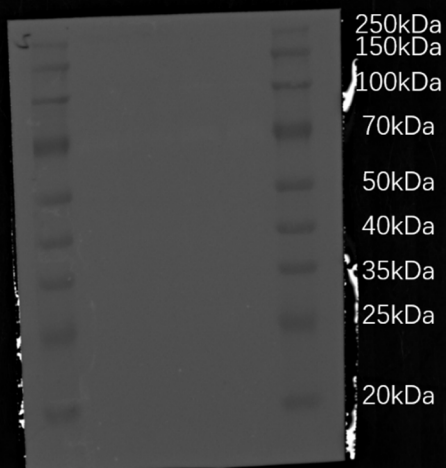

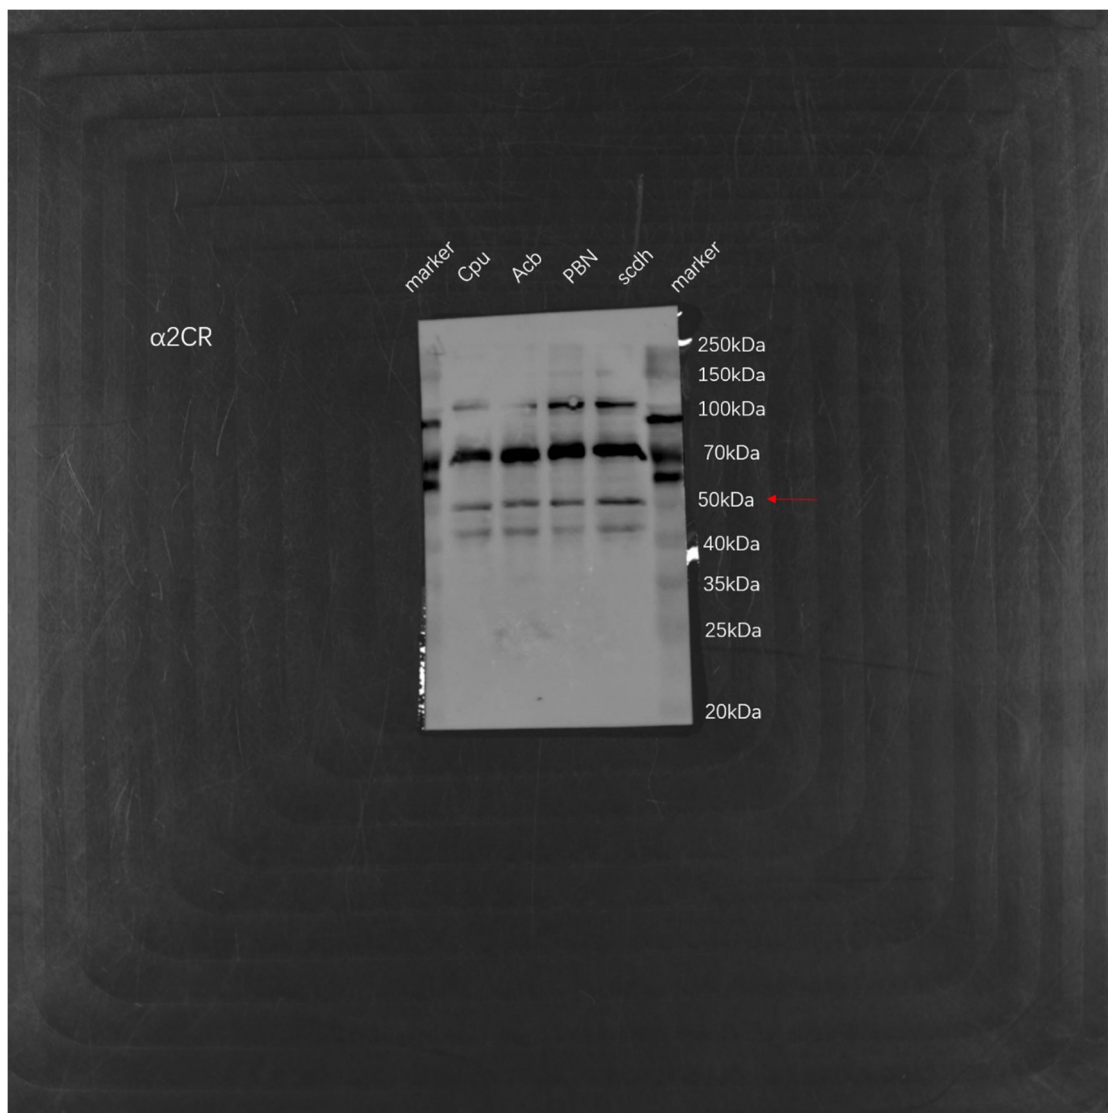

$\alpha$ 2CR

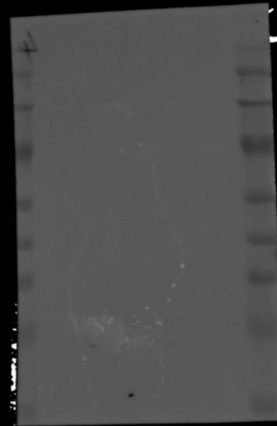

250kDa  
150kDa  
100kDa  
70kDa  
50kDa  
40kDa  
35kDa  
25kDa  
20kDa

$\alpha 2DR$

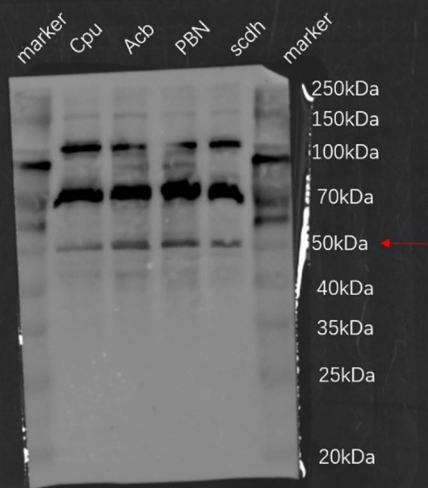

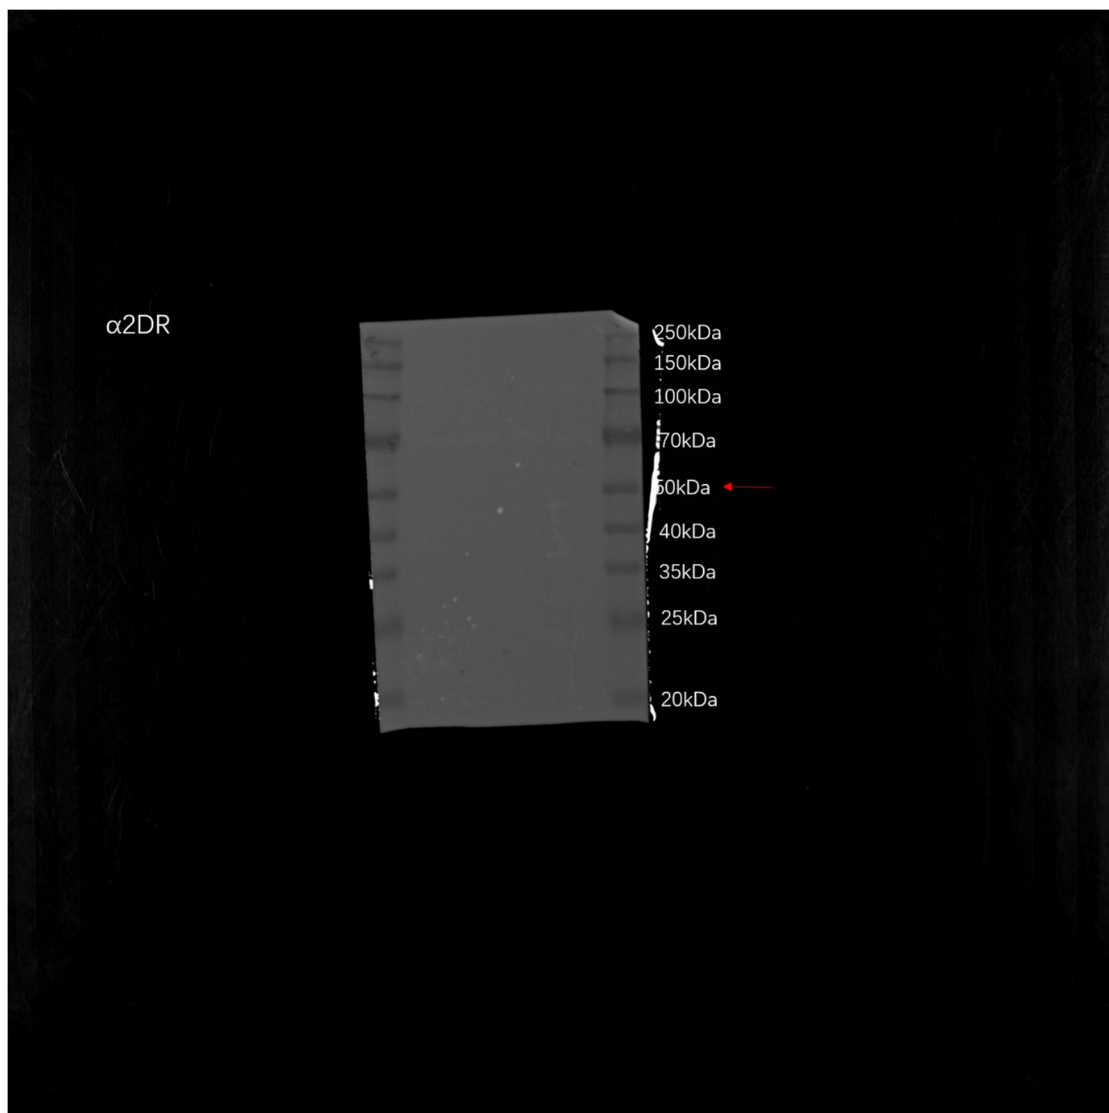

Supplementary figure S5. Original western blot figure in Figure 3
